# Supplementary material
Source: PubMed Central journal article supplement (PMC2727158)

Supplemental Fig. 1

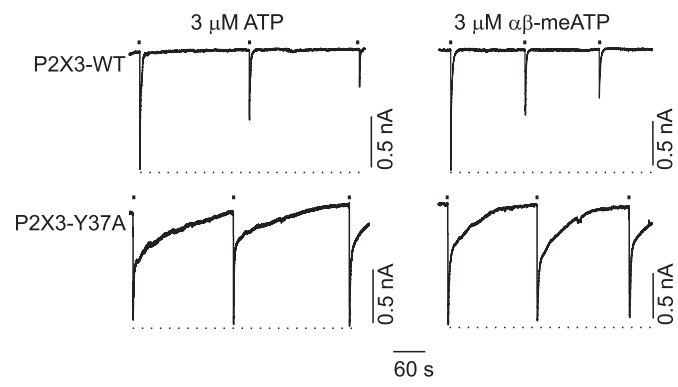

Supplement: NIHMS104865-supplement-Supp_Fig_1.pdf [file NIHMS104865-supplement-Supp_Fig_1.pdf]

Supplemental Fig. 2

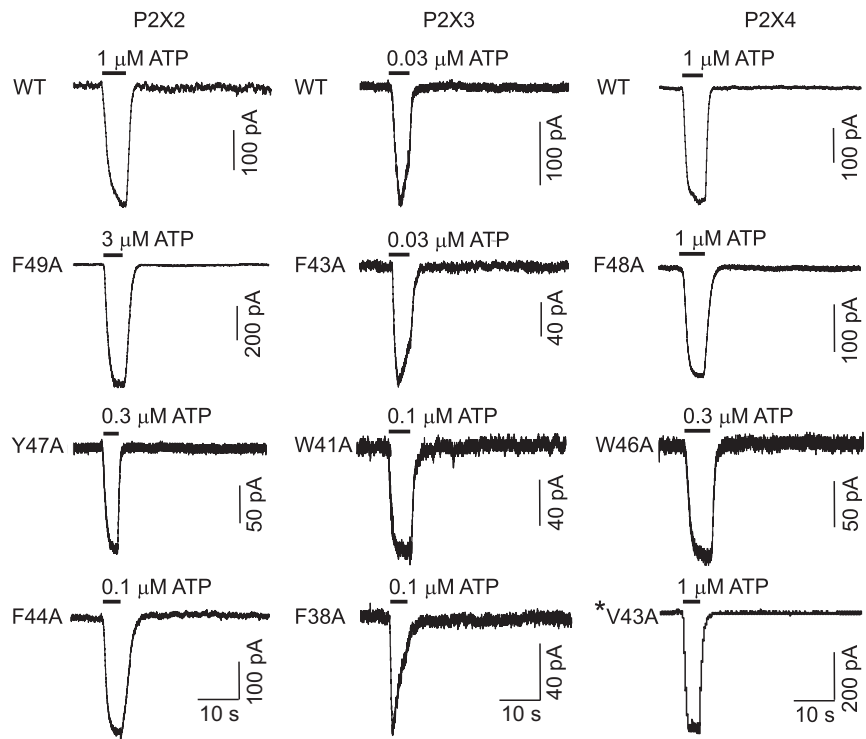

Supplement: NIHMS104865-supplement-Supp_Fig_2.pdf [file NIHMS104865-supplement-Supp_Fig_2.pdf]
